# Supplementary material
Source: publisher site journal article supplement (https://www.dovepress.com/article/209291)

S1

HepG2

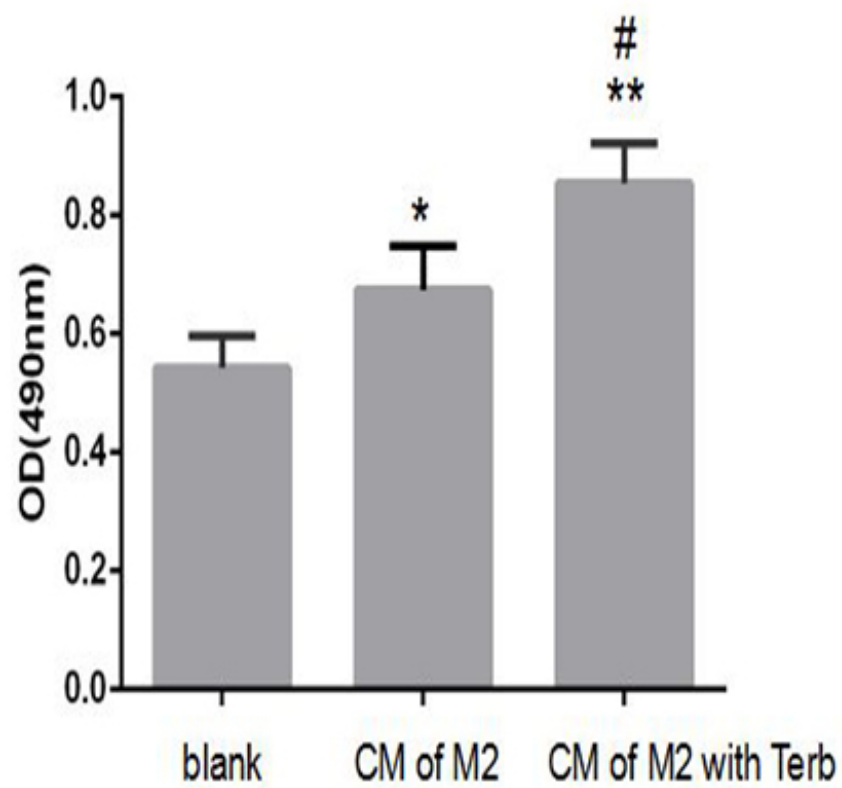

SMMC-7721

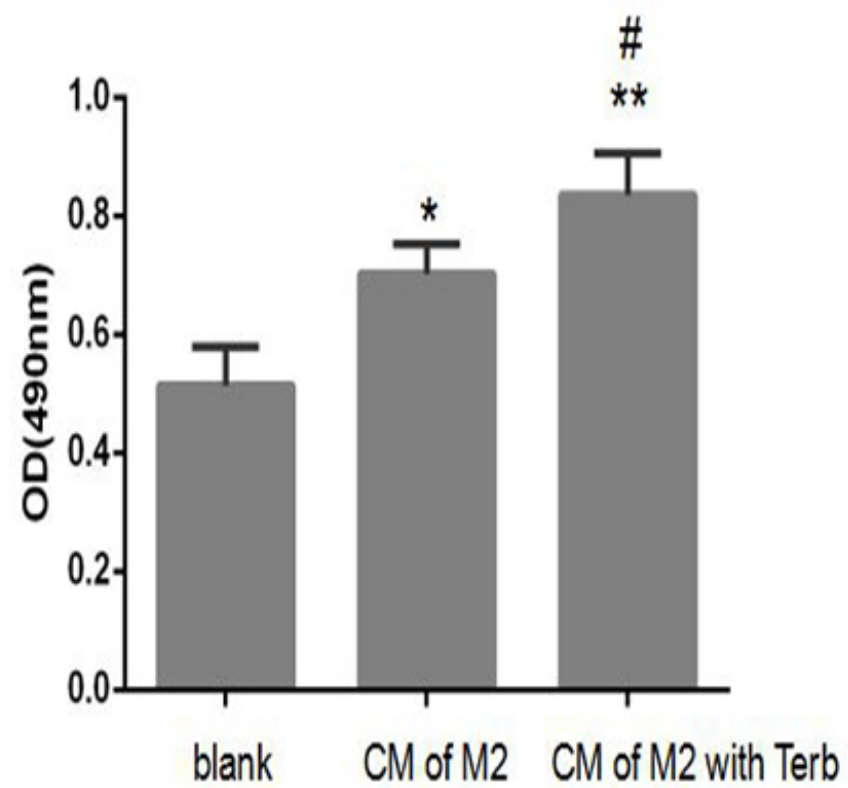

S2

HepG2

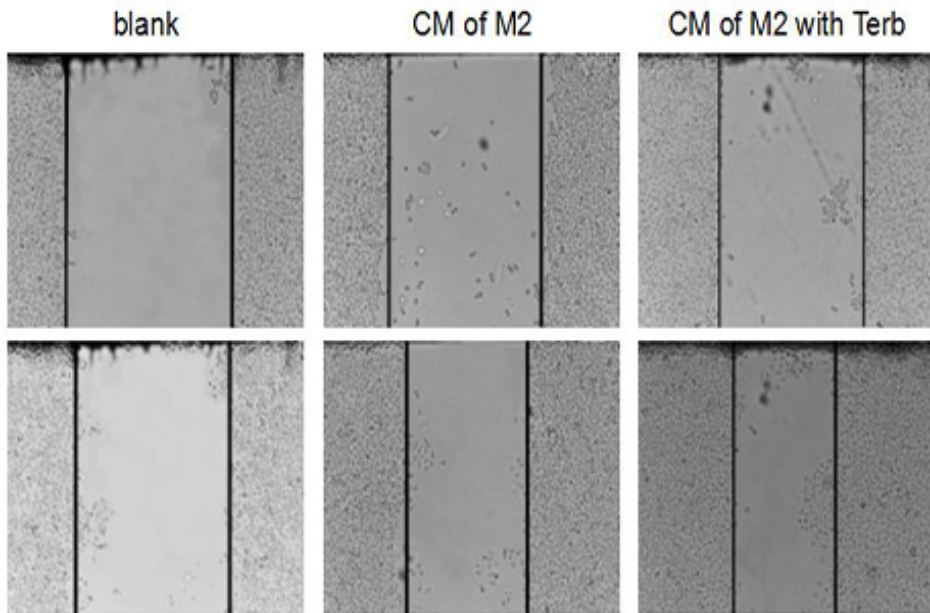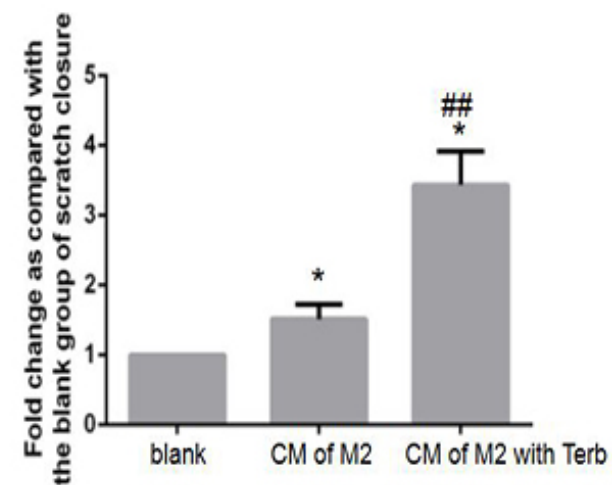

SMMC-7721

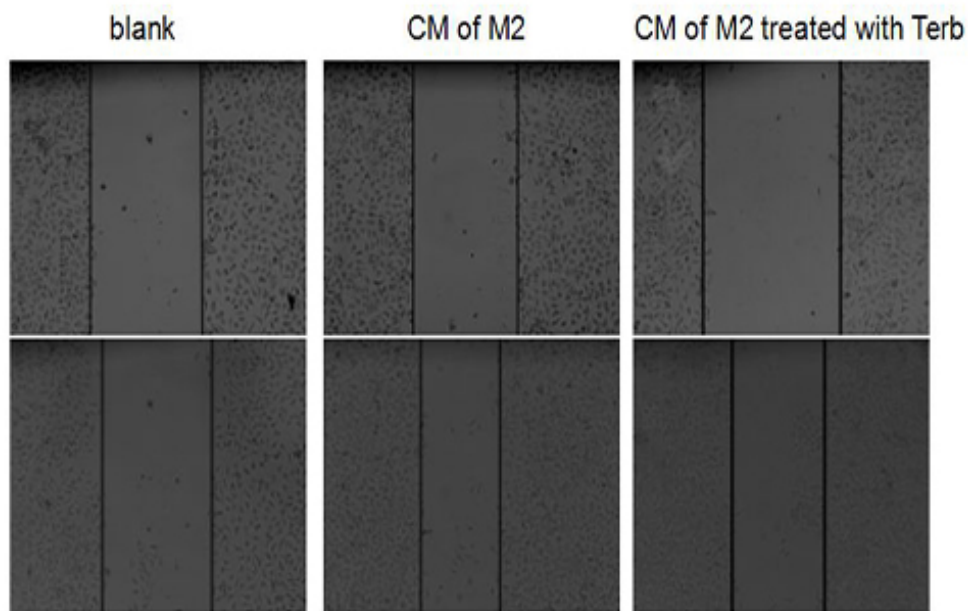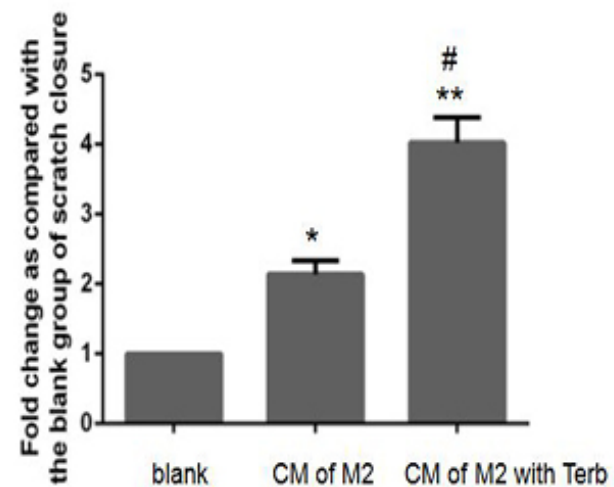

S3

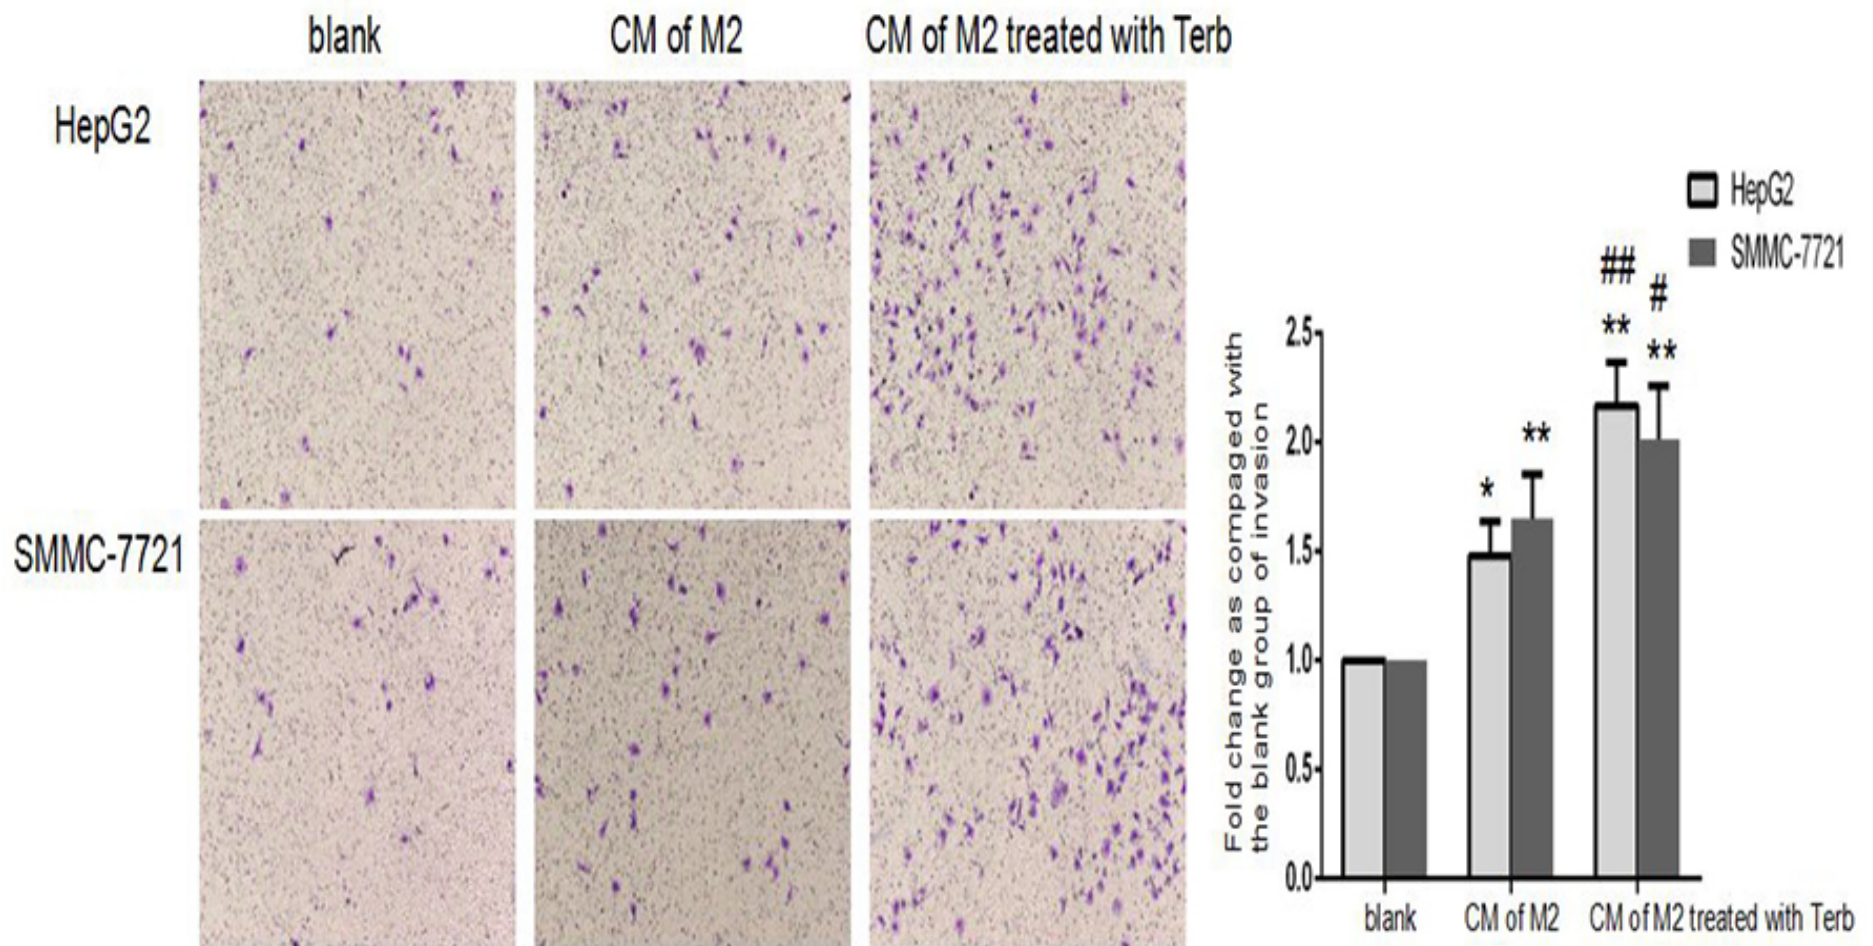

Supplement: Supplementary file 1 [file get_supplementary_file.php]
